# Supplementary material for: Microclimate Simulations Reveal the Potential of Multifunctional Green Infrastructure for Urban Heat Mitigation
Source: Research Square preprint supplement (doi:10.21203/rs.3.rs-6070841/v1), 2025-11-06
Supplement: Supplementary file 1 [file fd25b88936445595c11fee2b.pdf]

# Supplementary Information for “Microclimate Simulations Reveal the Potential of Multifunctional Green Infrastructure for Urban Heat Mitigation”

Angana Borah<sup>1</sup>, Sushobhan Sen<sup>1</sup>, Udit Bhatia<sup>1,2\*</sup>

<sup>1</sup>Department of Civil Engineering, Indian Institute of Technology Gandhinagar, Palaj, Gandhinagar, 382055, Gujarat, India.

<sup>2</sup>Department of Computer Science and Engineering, Indian Institute of Technology Gandhinagar, Palaj, Gandhinagar, 382055, Gujarat, India.

\*Corresponding author(s). E-mail(s): [bhatia.u@iitgn.ac.in](mailto:bhatia.u@iitgn.ac.in);  
Contributing authors: [borah\\_angana@iitgn.ac.in](mailto:borah_angana@iitgn.ac.in);  
[sushobhan.sen@iitgn.ac.in](mailto:sushobhan.sen@iitgn.ac.in);

## 1 Supplementary note 1

### Base scenario

**Table S1** Base scenario: Roof materials properties

| Material | Absorption | Emissivity | Specific Heat<br>(J/kg·K) | Thermal<br>Conductivity<br>(W/m·K) | Density<br>(kg/m <sup>3</sup> ) |
|----------|------------|------------|---------------------------|------------------------------------|---------------------------------|
| Concrete | 0.8        | 0.8        | 200                       | 0.2                                | 620                             |
| Tin      | 0.5        | 0.1        | 500                       | 203                                | 2700                            |
| Tiles    | 0.9        | 0.7        | 300                       | 0.84                               | 1900                            |

### Green Infrastructure (GI) Scenarios

**Table S2** Base scenario: Wall material properties

| Material            | Absorption | Emissivity | Specific Heat<br>(J/kg·K) | Thermal<br>Conductivity<br>(W/m·K) | Density<br>(kg/m <sup>3</sup> ) |
|---------------------|------------|------------|---------------------------|------------------------------------|---------------------------------|
| Good Insulation     | 0.5        | 0.7        | 800                       | 0.6                                | 1274.64                         |
| Moderate Insulation | 0.52       | 0.75       | 650                       | 0.65                               | 1686                            |
| No Insulation       | 0.52       | 0.65       | 570                       | 0.6                                | 1856                            |

**Table S3** Base scenario: Soil profile properties

| Profile               | Emissivity | Albedo | Roughness Length<br>(m) | Heat<br>Conductivity<br>(W/m·K) |
|-----------------------|------------|--------|-------------------------|---------------------------------|
| Barren                | 0.6        | 0.1    | 0.015                   | -                               |
| Other Surfaces        | 0.5        | 0.05   | 0.01                    | -                               |
| W/O Flexible Pavement | 0.6        | 0.1    | 0.01                    | 1.63                            |
| Loamy Soil            | 0.6        | 0.0    | 0.015                   | -                               |
| Asphalt Road          | 0.6        | 0.1    | 0.01                    | -                               |
| W/O Concrete Pavement | 0.5        | 0.1    | 0.01                    | -                               |
| Urban Surfaces        | 0.6        | 0.2    | 0.01                    | 1.63                            |
| Service Lane          | 0.5        | 0.2    | -                       | 1.63                            |
| Default Surface       | 0.9        | 0.2    | 0.015                   | -                               |

**Table S4** Base scenario: Vegetation properties

| Type  | Transmission | Emissivity | Albedo |
|-------|--------------|------------|--------|
| Grass | 0.2          | 0.8        | 0.2    |

**Table S5** Green Roof (GR) Material Properties

| Material     | Transmission | Emissivity | Albedo | Plant Height (m) | LAI |
|--------------|--------------|------------|--------|------------------|-----|
| Funkia Hosta | 0.3          | 0.97       | 0.2    | 0.4              | 1.5 |
| Substrate    | -            | 0.95       | 0.3    | -                | -   |

**Table S6** Permeable Pavement (PP) Material Properties

| Material      | Volumetric Heat<br>Capacity<br>(J/kg·K) | Heat<br>Conductivity<br>(W/m·K) | Saturation Water<br>Content | Field<br>Capacity | Wilting<br>Point |
|---------------|-----------------------------------------|---------------------------------|-----------------------------|-------------------|------------------|
| Smashed Brick | 2                                       | 0                               | 0.395                       | 0.135             | 0.068            |

**Table S7** Bioretention Cell (BRC) Vegetation Properties

| Type        | Transmission | Emissivity | Albedo | Plant Height (m) |
|-------------|--------------|------------|--------|------------------|
| Hedge Light | 0.3          | 0.97       | 0.2    | 0.8              |

## 2 Supplementary note 2

### Methodology

We validated the ENVI-met model by comparing observed and simulated temperatures, achieving a high correlation ( $R^2 = 0.87$ ), which indicates reliable model performance. We collected spatially distributed temperature data using mobile sensors mounted on a survey vehicle. Additionally, we documented land use and building typologies through field surveys and imagery to provide contextual information for the study.

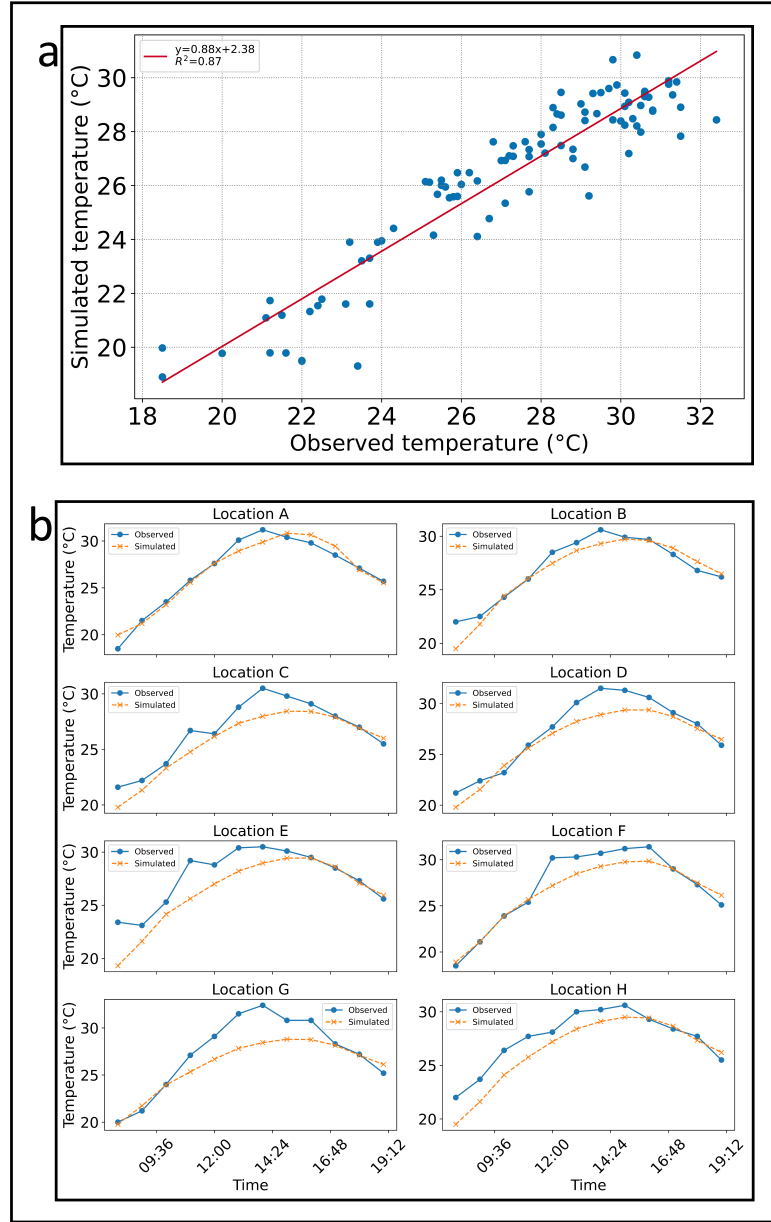

**Fig. S1** Validation of the ENVI-met model. (a) Comparison of observed and simulated temperature for all surveyed locations between 8:00 AM and 7:00 PM on 10 February 2024 at a height of 2 m, yielding an  $R^2$  of 0.87. (b) Time-series plot of observed and simulated temperatures, illustrating close temporal agreement.



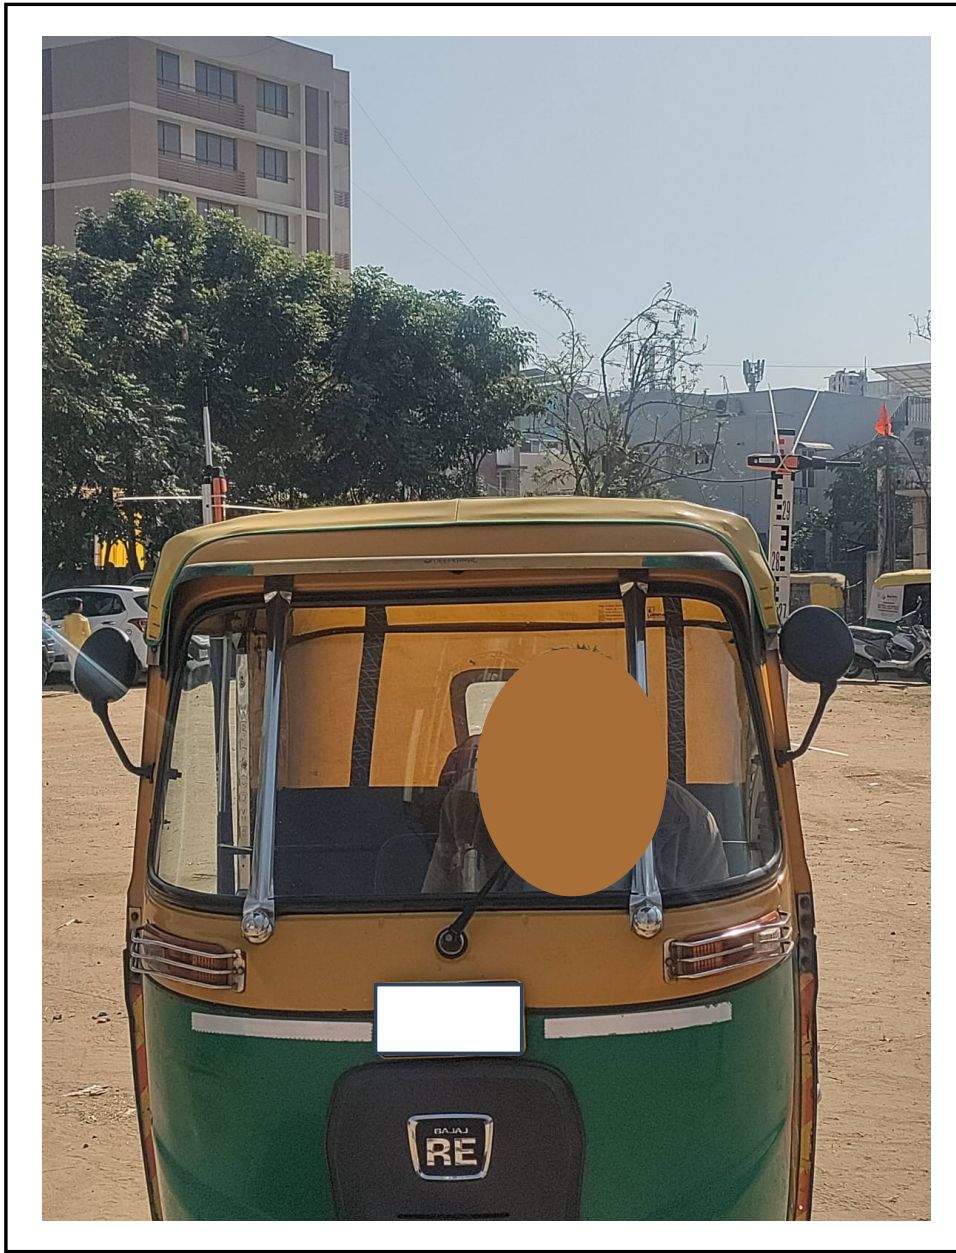

**Fig. S2** Photograph of the survey vehicle used for mobile temperature measurements, equipped with mounted temperature sensors.

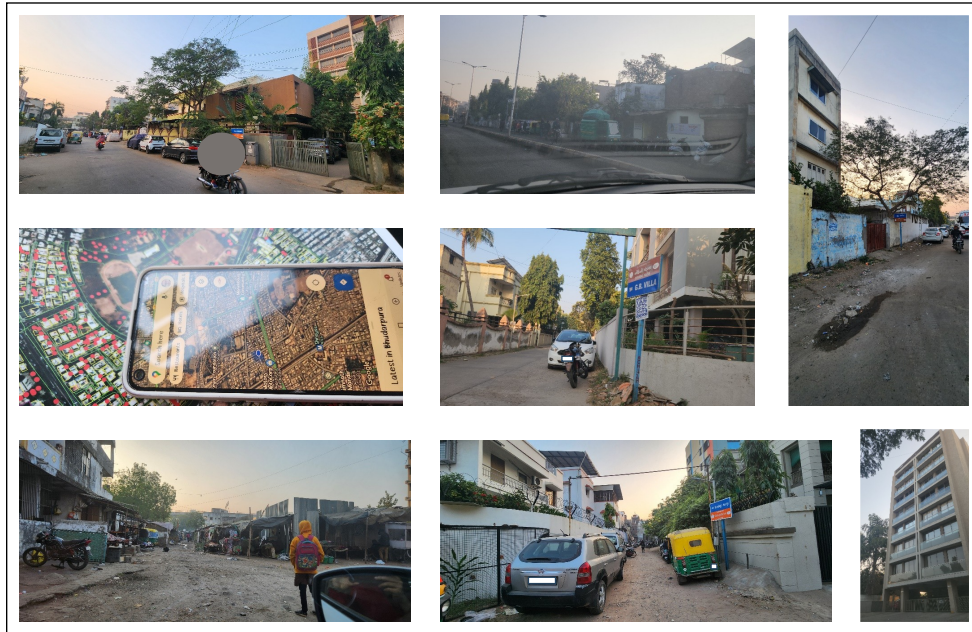

**Fig. S3** Snapshots from the surveyed study area depicting land use characteristics and building typologies. These images provide a general overview of the urban landscape, highlighting key features relevant to the study's environmental and climatic assessment.

### 3 Supplementary note 3

## Results

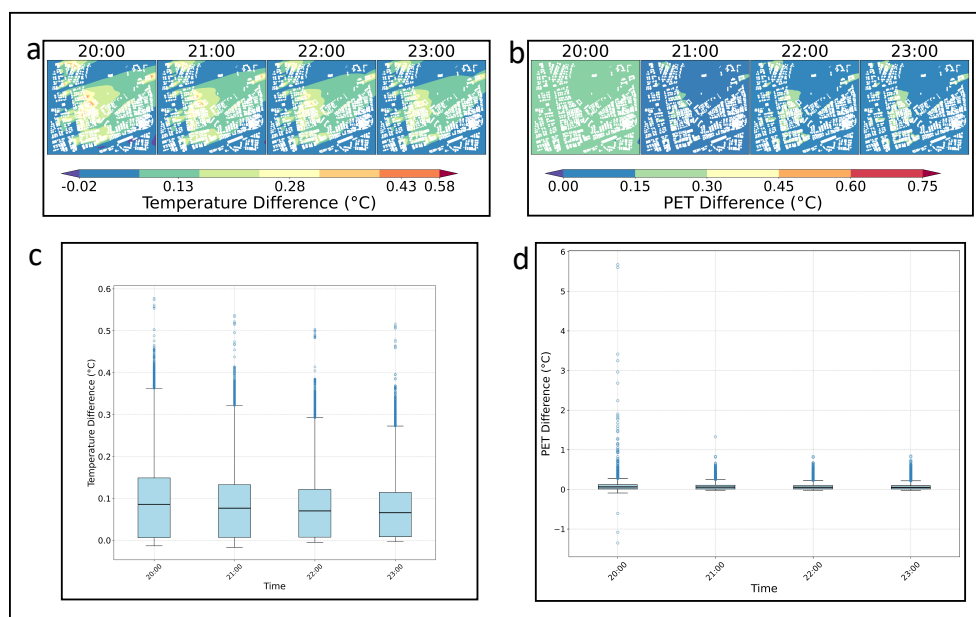

**Fig. S4** Impact of Green Roofs (GR) on Temperature and Thermal Comfort During Nighttime (8 PM - 11 PM). a) and (b) illustrate the temperature differences between the Base scenario and the GR scenario. (a) shows the spatial distribution of these temperature differences across the study area, visually depicting the cooling effects of GR interventions. (b) presents the box plot representation, quantifying the variability and range of temperature differences across different urban locations. (c) and (d) focus on the impact of GR on Physiological Equivalent Temperature (PET). (c) maps the spatial distribution of PET differences, highlighting areas where GR implementation has led to improved nighttime thermal conditions. (d) provides a box plot analysis, capturing the distribution of PET reductions and emphasizing the extent to which GR enhances pedestrian-level comfort during nighttime hours.

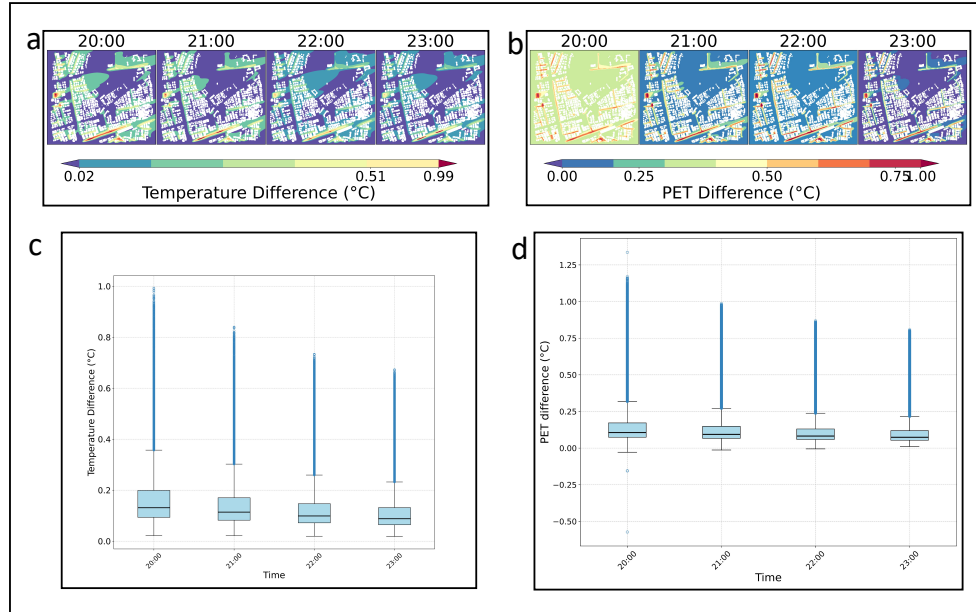

**Fig. S5** Impact of Permeable Pavements (PP) on Temperature and Thermal Comfort During Night-time (8 PM - 11 PM). (a) and (b) illustrate the temperature differences between the Base scenario and the Permeable Pavement (PP) scenario. (a) displays the spatial distribution of these temperature differences across the study area, highlighting the cooling effects of PP interventions. (b) presents the box plot representation, quantifying the variability and range of temperature differences observed across different urban locations. (c) and (d) examine the impact of PP on Physiological Equivalent Temperature (PET), a measure of thermal comfort. (c) shows the spatial distribution of PET differences, identifying areas where PP implementation has contributed to improved nighttime thermal conditions. (d) provides a box plot analysis, capturing the distribution of PET reductions and emphasizing the extent to which PP enhances pedestrian-level comfort during nighttime hours.

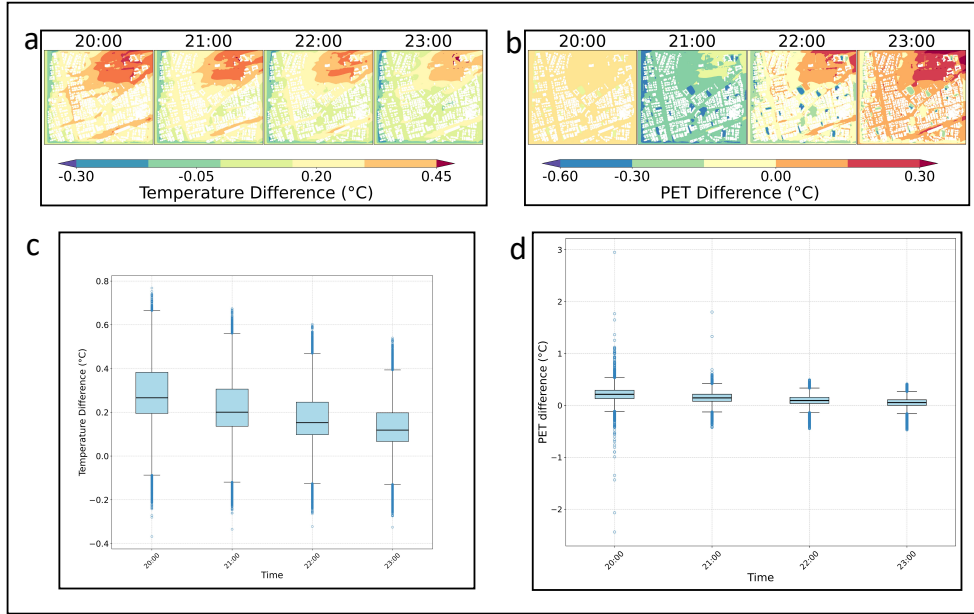

**Fig. S6** Impact of Bioretention Cells (BRC) on Temperature and Thermal Comfort During Night-time (8 PM - 11 PM). (a) and (b) illustrate the temperature differences between the Base scenario and the Bioretention Cell (BRC) scenario. (a) presents the spatial distribution of temperature differences across the study area, showcasing the cooling effects of BRC implementation. (b) provides a box plot representation, capturing the variability and range of temperature differences across different urban locations. (c) and (d) highlight the influence of BRC on Physiological Equivalent Temperature (PET), an indicator of thermal comfort. (c) visualizes the spatial distribution of PET differences, identifying regions where BRC interventions have led to improved nighttime thermal conditions. (d) displays a box plot analysis, illustrating the distribution of PET reductions and emphasizing the extent to which BRCs contribute to enhancing pedestrian-level comfort during nighttime hours.

**Table S8** Comparative Summary of Urban Flood and Urban Heat Study

| Aspect                    | Urban Flood Study [1]                                                                                                                                                                                          | Current Work (This study)                                                                                                                                                                                                                                                                                         |
|---------------------------|----------------------------------------------------------------------------------------------------------------------------------------------------------------------------------------------------------------|-------------------------------------------------------------------------------------------------------------------------------------------------------------------------------------------------------------------------------------------------------------------------------------------------------------------|
| Study Area                | Ahmedabad, India (16 sq. km)                                                                                                                                                                                   | Ahmedabad, India (1 sq. km)                                                                                                                                                                                                                                                                                       |
| Primary Focus             | Flood mitigation using Green Infrastructure (GI)                                                                                                                                                               | Heat mitigation using GI                                                                                                                                                                                                                                                                                          |
| Methodologies Applied     | 1D-2D Hydrodynamic Modeling (DHI-MIKE+)                                                                                                                                                                        | High-resolution urban climate modeling                                                                                                                                                                                                                                                                            |
| Hydrological Component    | Modeled flood extent, peak flood depth, runoff reduction                                                                                                                                                       | No direct hydrological modeling, but linked through soil moisture and evapotranspiration                                                                                                                                                                                                                          |
| Thermal Component         | Not explicitly considered                                                                                                                                                                                      | Surface and air temperature reduction analysis                                                                                                                                                                                                                                                                    |
| Data Sources              | Sentinel-1 & Sentinel-2, field surveys, stormwater drainage (SWD) network data                                                                                                                                 | High-resolution local meteorological & satellite data                                                                                                                                                                                                                                                             |
| GI Interventions Analyzed | Bioretention cells, permeable pavements, green roofs, vegetative swales                                                                                                                                        | Bioretention cells, permeable pavements, green roofs                                                                                                                                                                                                                                                              |
| Temporal Scale            | Simulated flood events for 2020-2022                                                                                                                                                                           | Heat simulations focusing on diurnal variations                                                                                                                                                                                                                                                                   |
| % GI Application          | 6%-24% per sub-catchment                                                                                                                                                                                       | 3%-6% of total study area                                                                                                                                                                                                                                                                                         |
| Main Performance Metrics  | Runoff reduction coefficient, flood extent, peak flood depth                                                                                                                                                   | Air temperature reduction, PET (Physiological Equivalent Temperature)                                                                                                                                                                                                                                             |
| Main Findings             | Green roofs Provided only modest runoff volume reduction (3.8%); Permeable pavements reduced flood volume by 20%, flooded area by 26.7%; Bioretention cells reduced flood volume by 24%, flooded area by 32% ; | Green roofs contributed localized cooling of up to 0.6°C, but had limited overall thermal impact; Permeable pavements provided moderate cooling benefits, reducing peak air temperature by about 0.8°C in the late afternoon; bioretention cells had the highest cooling impact, reduced temperature by upto 2°C; |
| Scale Comparison          | GI effects were studied across an entire urban drainage network                                                                                                                                                | GI effects were analyzed at a fine-scale neighborhood level                                                                                                                                                                                                                                                       |

## References

- [1] Borah, A., Bardhan, R., Bhatia, U.: Protecting heritage: Insights into effective flood management using green infrastructure in a highly urbanized environment. *International Journal of Disaster Risk Reduction* **98**, 104075 (2023)
